# Supplementary material for: Synthesis, structure and the Hirshfeld surface analysis of three novel metal-tiron coordination complexes
Source: Royal Society of Chemistry journal article supplement (doi:10.1039/d1ra00207d), 2021-01-01
Supplement: d1ra00207d1.pdf [file d1ra00207d1.pdf]

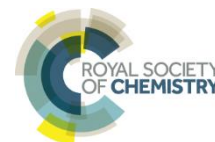

Journal Name

ARTICLE

Supporting Information

## Synthesis, structure and Hirshfeld surface analysis of three novel metal-tiron coordination complexes

Ranjay K. Tiwari<sup>a, b, c</sup>, Ipsha Shruti<sup>a, b</sup> and J. N. Behera<sup>a, b, \*</sup>

<sup>a</sup> School of Chemical Sciences, National Institute of Science Education and Research (NISER), Bhubaneswar, P.O. Jatni, Khurda, Odisha-752050, India.

<sup>b</sup> Homi Bhabha National Institute, Mumbai, India.

<sup>c</sup> Department of Chemistry, University of Delhi Faculty of Science, North Campus, Delhi-110007, India.

\*e-mail:jnbehera@niser.ac.in

**Bond Valence Sum Calculations**

The bond valence sum calculated from the formula

$$S = \exp[(R_0 - R)/B]$$

$$V = \sum S$$

**For 1**

Where  $B = 0.37$ ,  $R_0$  for Cd-O = 1.904 and R is Cd-O bond length

$$S1 = \exp[(1.904 - 2.335)/0.37] = 0.3119$$

$$S2 = \exp[(1.904 - 2.290)/0.37] = 0.3523$$

$$S3 = \exp[(1.904 - 2.333)/0.37] = 0.3136$$

$R_0$  for Cd-N = 1.96 and R is Cd-N bond length

$$S4 = \exp[(1.96 - 2.333)/0.37] = 0.3649$$

$$S5 = \exp[(1.96 - 2.316)/0.37] = 0.3820$$

$$S6 = \exp[(1.96 - 2.358)/0.37] = 0.3410$$

And  $V = \sum S$

$$V = S1 + S2 + S3 + S4 + S5 + S6 = 2.0657$$

**For 2**

Co1 Where  $B = 0.37$ ,  $R_0$  for Co-O = 1.692 and R is Co-O bond length

$$S1 = \exp[(1.692 - 2.000)/0.37] = 0.4349$$

$$S2 = \exp[(1.692 - 2.000)/0.37] = 0.4349$$

$$S3 = \exp[(1.692 - 2.203)/0.37] = 0.2513$$

$$S4 = \exp[(1.692 - 2.203)/0.37] = 0.2513$$

$$S5 = \exp[(1.692 - 2.121)/0.37] = 0.3136$$

$$S6 = \exp[(1.692 - 2.121)/0.37] = 0.3136$$

And  $V = \sum S$

$$V = S1 + S2 + S3 + S4 + S5 + S6 = 1.9996$$

Co2 Where  $B = 0.37$ ,  $R_0$  for Co-O = 1.692 and R is Co-O bond length

$$S1 = \exp[(1.692 - 2.142)/0.37] = 0.2963$$

$$S2 = \exp[(1.692 - 2.057)/0.37] = 0.3728$$

$$S3 = \exp[(1.692 - 2.130)/0.37] = 0.3061$$

$$S4 = \exp[(1.692 - 2.062)/0.37] = 0.3678$$

$$S5 = \exp[(1.692 - 2.103)/0.37] = 0.3292$$

$R_o$  for Co-N = 1.790 and R is Co-N bond length

$$S6 = \exp[(1.790 - 2.174)/0.37] = 0.3542$$

And  $V = \sum S$

$$V = S1 + S2 + S3 + S4 + S5 + S6 = 2.0264$$

### For 3

Where  $B = 0.37$ ,  $R_o$  for Ba-O = 2.285 and R is Ba-O bond length

$$S1 = \exp[(2.285 - 2.699)/0.37] = 0.3266$$

$$S2 = \exp[(2.285 - 2.724)/0.37] = 0.3052$$

$$S3 = \exp[(2.285 - 2.861)/0.37] = 0.2108$$

$$S4 = \exp[(2.285 - 2.864)/0.37] = 0.2091$$

$$S5 = \exp[(2.285 - 2.796)/0.37] = 0.2513$$

$$S6 = \exp[(2.285 - 2.877)/0.37] = 0.2018$$

$$S7 = \exp[(2.285 - 2.831)/0.37] = 0.2286$$

$$S8 = \exp[(2.285 - 2.872)/0.37] = 0.2046$$

$$S9 = \exp[(2.285 - 2.878)/0.37] = 0.2013$$

And  $V = \sum S$

$$V = S1 + S2 + S3 + S4 + S5 + S6 + S7 + S8 + S9 = 2.1393$$

1. I. D. Brown and D. Altermatt, *Acta. Cryst.*, 1985, **B41**, 244-247.

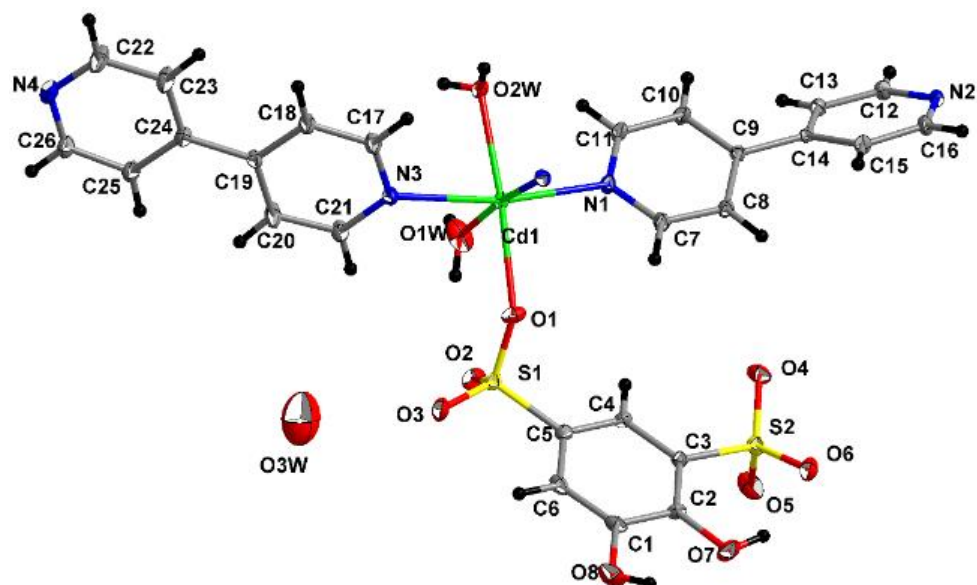

**Fig. S1.** Asymmetric unit of **1** with a 10 % thermal ellipsoidal probability drawn and unique atoms were labelled.

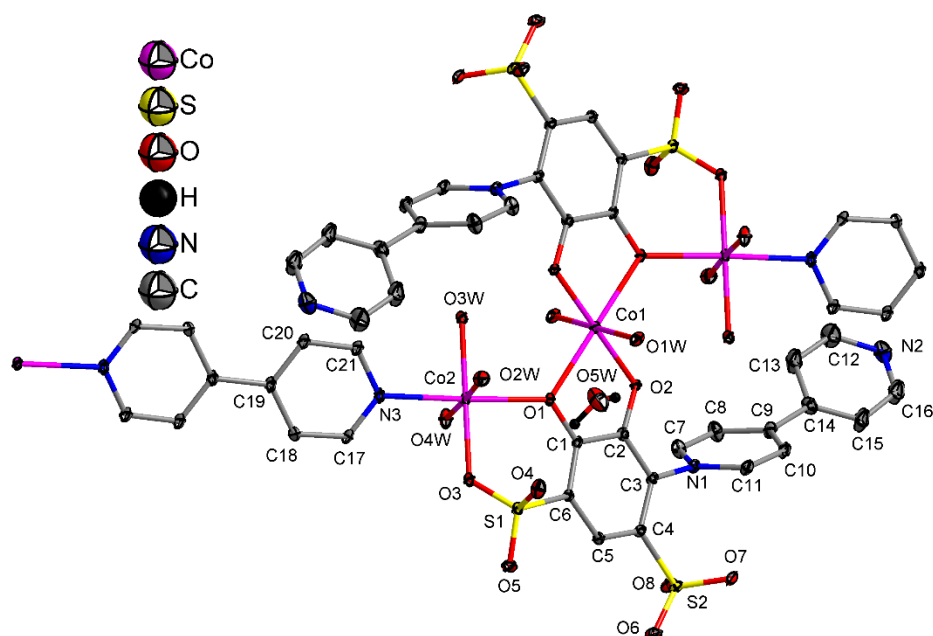

**Fig. S2.** Molecular unit presenting the coordination geometry of the Co(II) ions in **2**, where asymmetric units were labelled and thermal ellipsoidal probability drawn at 10 %.

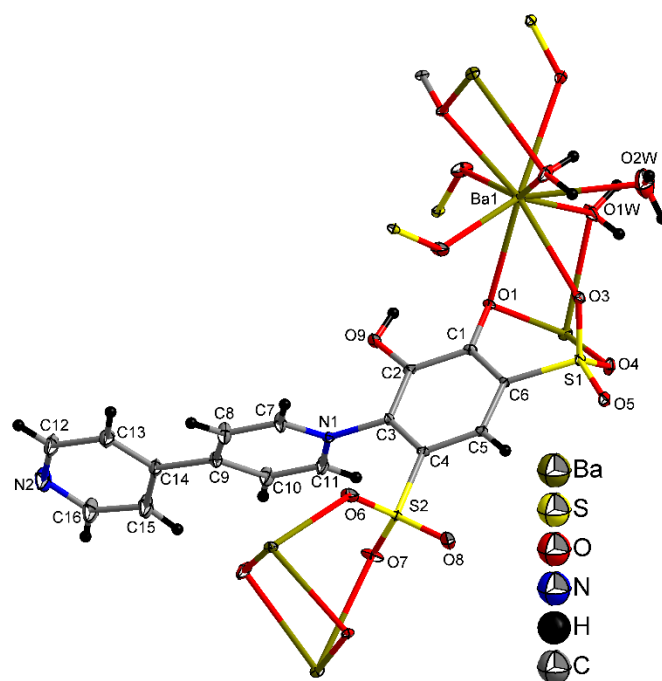

**Fig. S3.** Molecular unit of **3** where the asymmetric unit was labelled with 10 % thermal ellipsoidal probability and disorder by unit is shown by a ball and stick model.

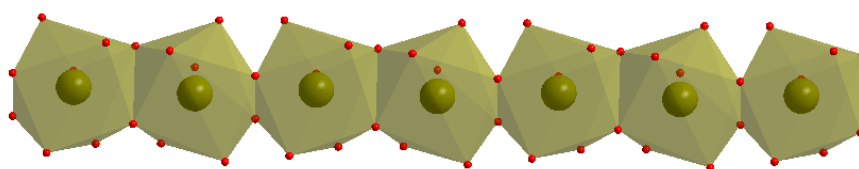

**Fig. S4.** A 1D Ba-O-Ba chain in **3** running along c-axis, formed between nona coordinated Ba(II) ions via edge-sharing.

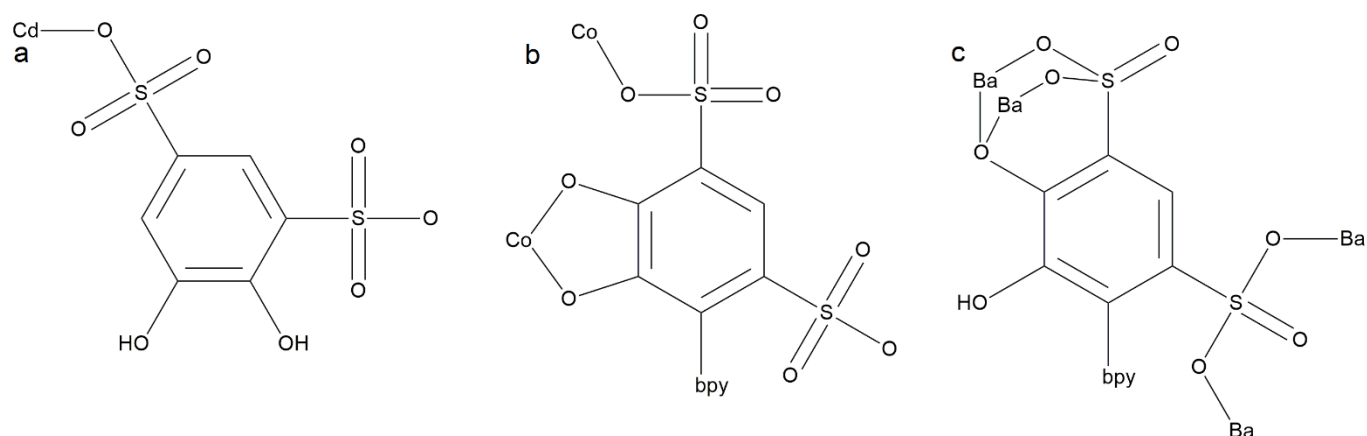

**Fig. S5.** Schematic representation of the coordination modes of the Metal-Tiron ligand a) for **1**, b) for **2** and c) for **3**.

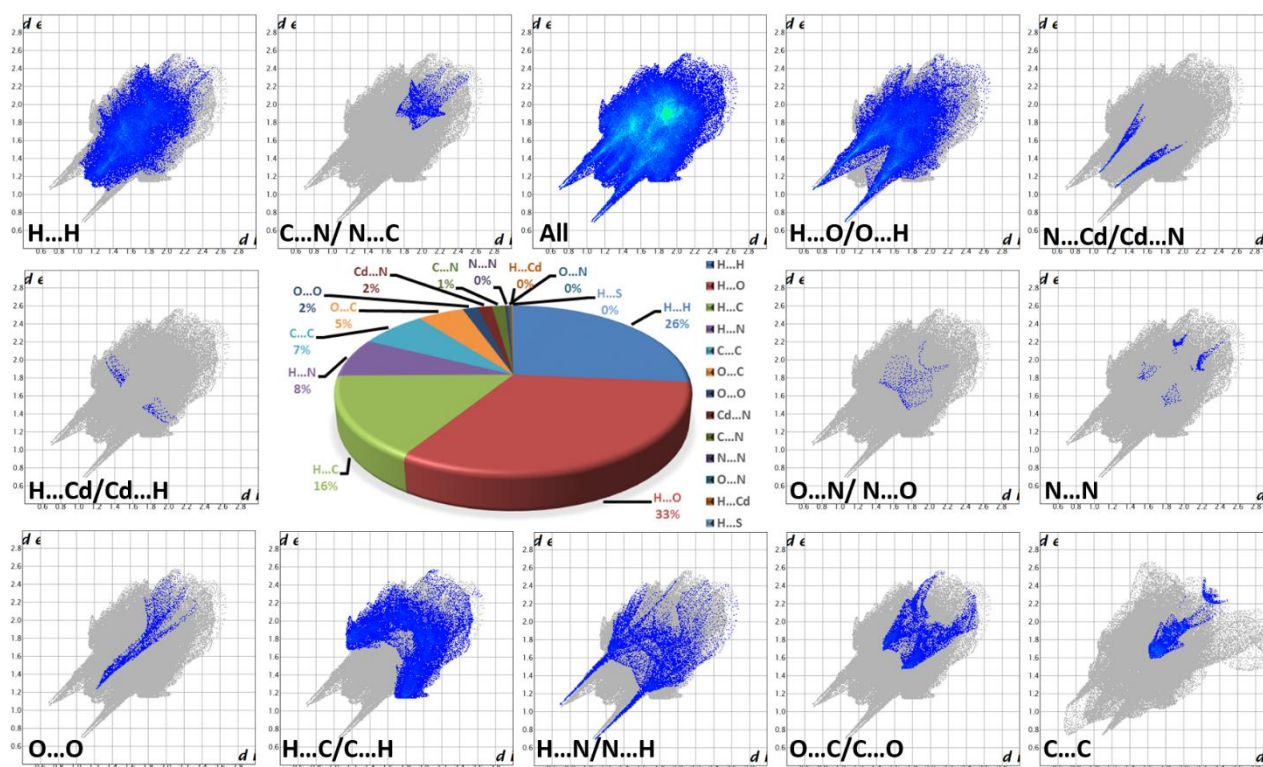

**Fig. S6.** The Percentage impact of different short intermolecular interaction in the crystal lattice of **1** along with the 2D fingerprint plots of short intermolecular interaction with their associate contributions to the Hirshfeld surface in the crystal lattice.

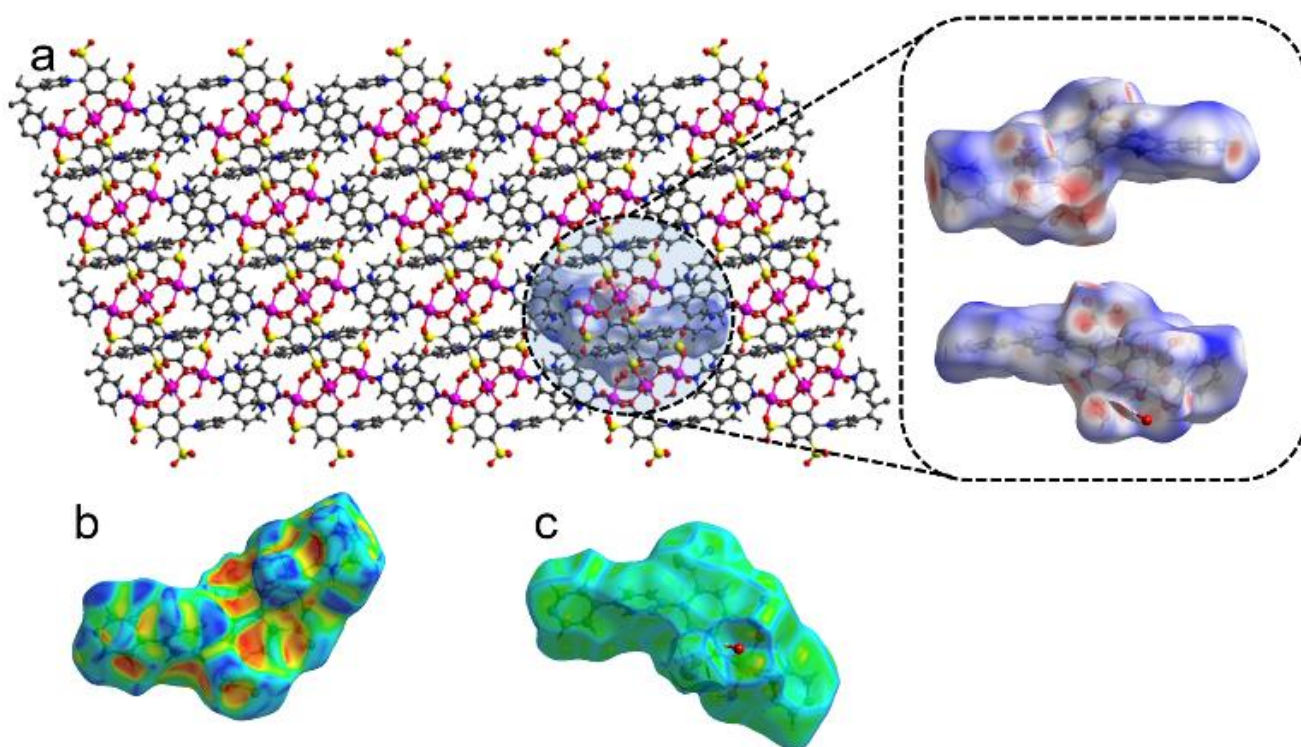

**Fig. S7.** (a) The perspective view of Hirshfeld surface in the crystal lattice of **2** which is highlighted in the circle and represented the  $d_{\text{norm}}$  plot in different direction of lattice, (b) the shape-index plot and (c) curvedness plot in the crystal lattice of **2**.

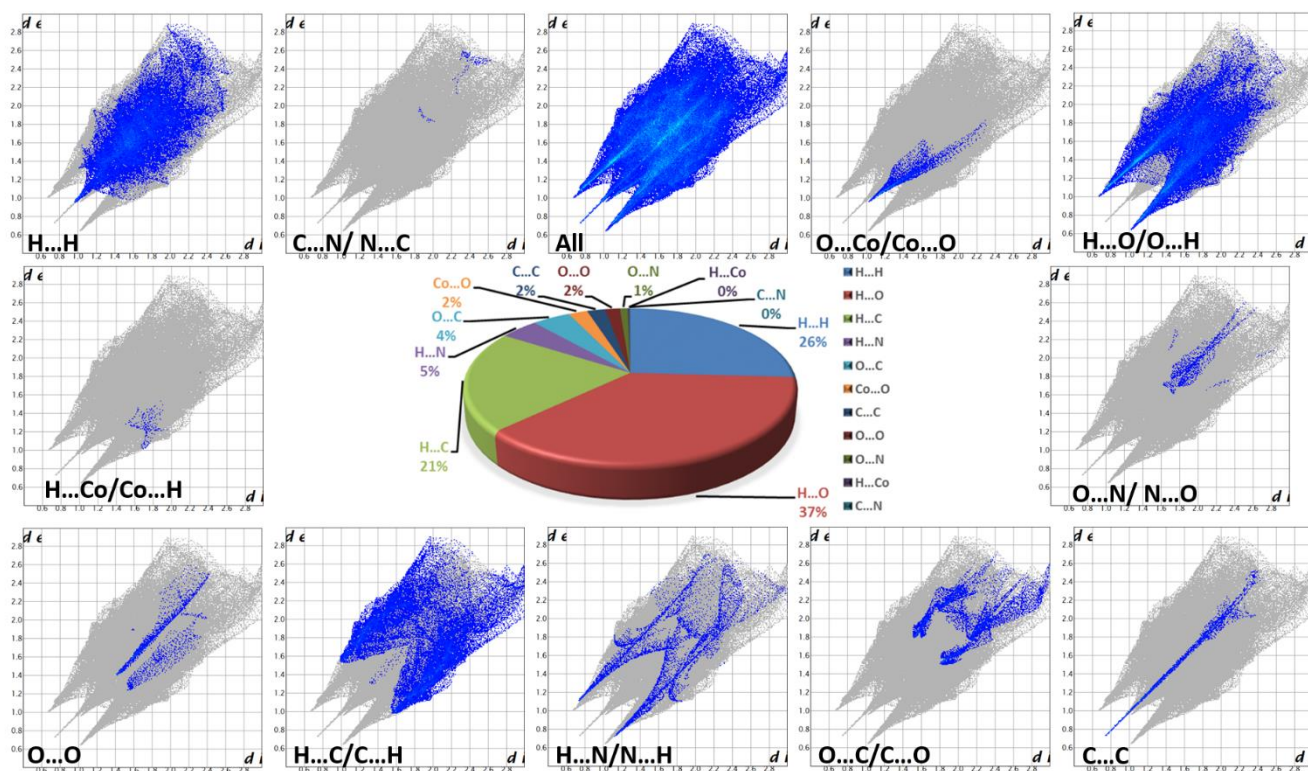

**Fig. S8.** The Percentage impact of different short intermolecular interaction in the crystal lattice of **2** along with the 2D fingerprint plots of short intermolecular interaction with their associate contributions to the Hirshfeld surface in the crystal lattice.



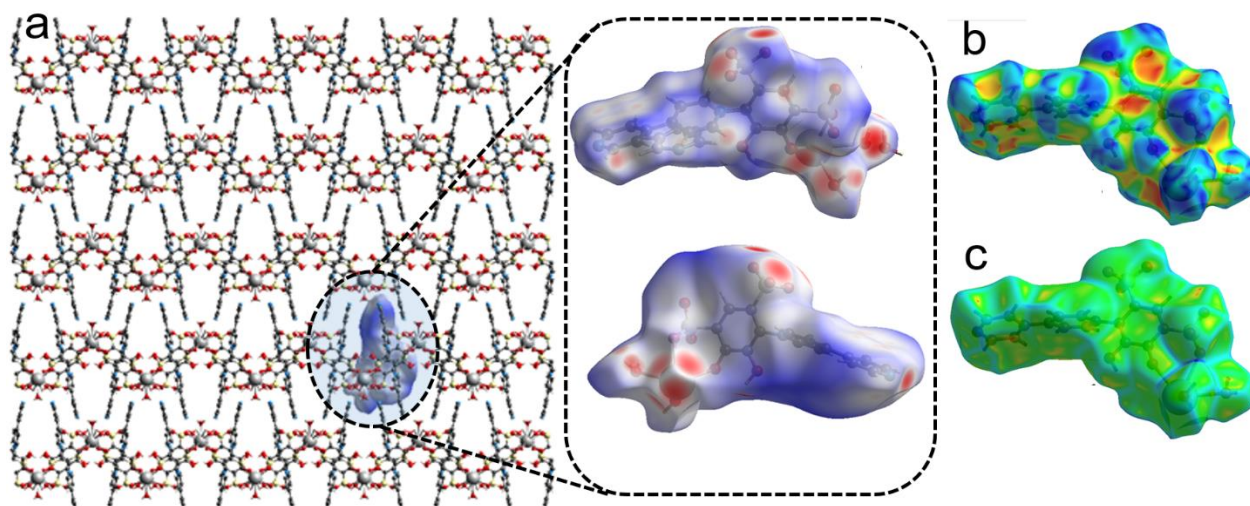

**Fig. S9.** (a) The perspective view of Hirshfeld surface in the crystal lattice of **3** which is highlighted in the circle and represented the  $d_{\text{norm}}$  plot in different direction of lattice, (b) the shape-index plot and (c) curvedness plot in the crystal lattice of **3**.

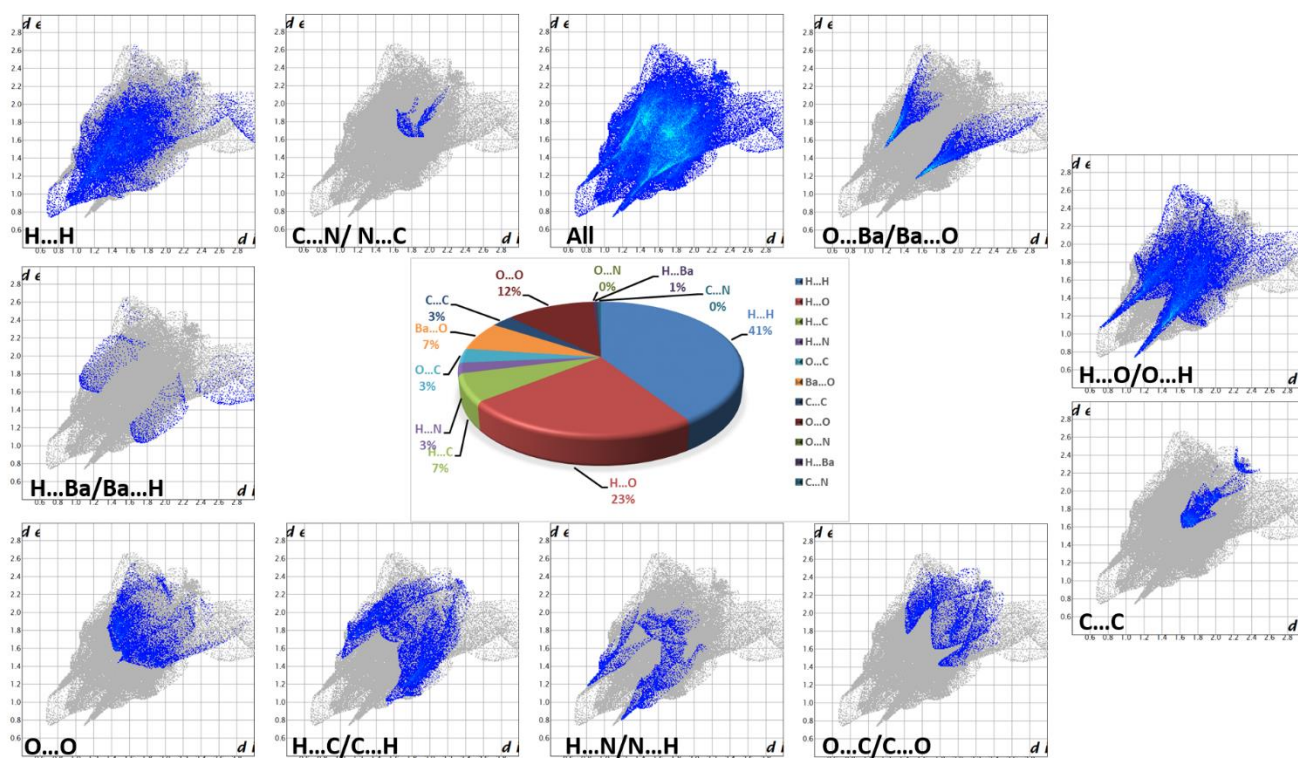

**Fig. S10.** The Percentage impact of different short intermolecular interaction in the crystal lattice of **3** along with the 2D fingerprint plots of short intermolecular interaction with their associate contributions to the Hirshfeld surface in the crystal lattice.

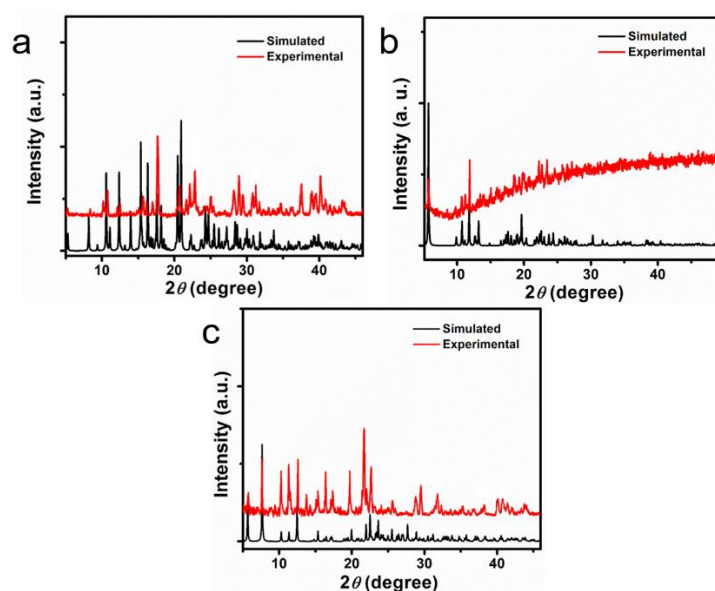

**Fig. S11.** PXRD pattern for a)  $[\text{Cd}(\text{tiron})(\text{bpy})_2(\text{H}_2\text{O})_2] \cdot 0.5(\text{H}_2\text{O})$ , **1**, b)  $[\text{Co}_3(\text{tiron-bpy})_2(\text{bpy})(\text{H}_2\text{O})_8] \cdot (\text{H}_2\text{O})_2$ , **2**, and c)  $[\text{Ba}_2(\text{tiron-bpy})_2(\text{H}_2\text{O})_4][\text{Solvent}]$ , **3**.

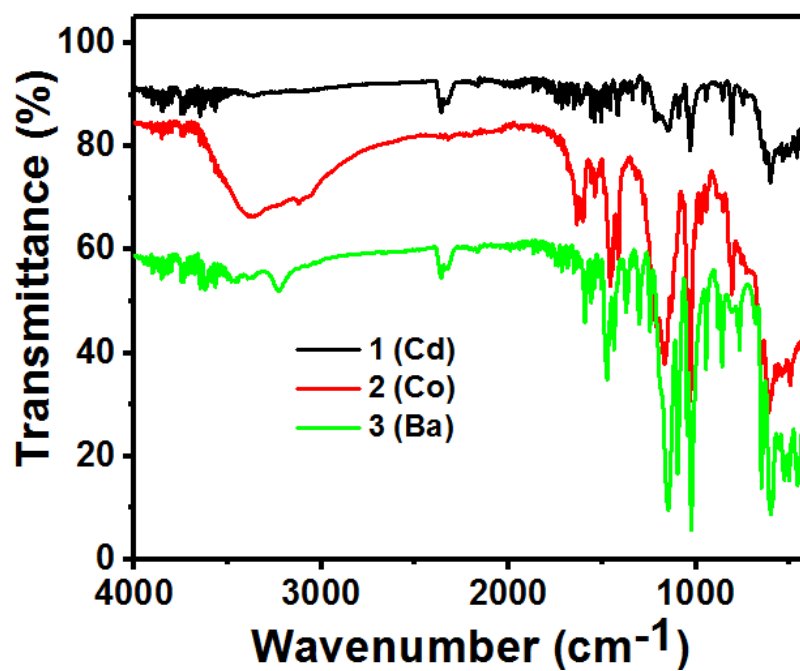

**Fig. S12.** FTIR profile diagram for a)  $[\text{Cd}(\text{tiron})(\text{bpy})_2(\text{H}_2\text{O})_2] \cdot 0.5(\text{H}_2\text{O})$ , **1**, b)  $[\text{Co}_3(\text{tiron-bpy})_2(\text{bpy})(\text{H}_2\text{O})_8] \cdot (\text{H}_2\text{O})_2$ , **2**, and c)  $[\text{Ba}_2(\text{tiron-bpy})_2(\text{H}_2\text{O})_4][\text{Solvent}]$ , **3**.

**Table S1.** Hydrogen bonding table for complexes **1-3**.#

| D-H...A                                                                                                         | Symmetry of A     | D-H      | H...A    | D-A       | ∠D-H...A |
|-----------------------------------------------------------------------------------------------------------------|-------------------|----------|----------|-----------|----------|
| <b>[Cd(tiron)(bpy)<sub>2</sub>(H<sub>2</sub>O)<sub>2</sub>].0.5(H<sub>2</sub>O), 1</b>                          |                   |          |          |           |          |
| O1W-H1WA...O3W                                                                                                  | x,y,-1+z          | 0.77     | 1.82(4)  | 2.541(8)  | 155(4)   |
| O1W-H1WA...O3A                                                                                                  | -1+x,y,-1+z       | 0.77     | 2.34(4)  | 2.944(11) | 135(4)   |
| O1W-H1WB...S1AA                                                                                                 |                   | 0.80(5)  | 2.61(5)  | 3.21(3)   | 134(4)   |
| O1W-H1WB...O2A                                                                                                  | x,y,-1+z          | 0.80(5)  | 2.20(5)  | 2.945(12) | 156(4)   |
| O1W-H1WB...O2AA                                                                                                 | x,y,-1+z          | 0.80(5)  | 1.82(5)  | 2.486(11) | 140(5)   |
| O2W-H2WA...N4                                                                                                   | 1-x,-y,1-z        | 0.79(3)  | 1.97(3)  | 2.738(5)  | 165(4)   |
| O2W-H2WB...O5                                                                                                   | x,y,1+z           | 0.81(4)  | 1.95(3)  | 2.725(4)  | 160(4)   |
| O7-H7...O6                                                                                                      |                   | 0.82     | 1.87     | 2.611(5)  | 151      |
| O8-H8...O4                                                                                                      | 1+x,y,z           | 0.82     | 2.04     | 2.783(5)  | 151      |
| O8-H8...O7                                                                                                      |                   | 0.82     | 2.28     | 2.662(5)  | 109      |
| C4-H4...O8                                                                                                      | -1+x,y,z          | 0.93     | 2.44     | 3.318(6)  | 157      |
| C4-H4...O2AA                                                                                                    | x,y,-1+z          | 0.93     | 2.54     | 2.965(11) | 108      |
| C6-H6...O3A                                                                                                     | x,y,-1+z          | 0.93     | 2.34     | 2.793(10) | 109      |
| C11-H11...O3W                                                                                                   |                   | 0.93     | 2.48     | 3.100(5)  | 124      |
| C15-H15...O5                                                                                                    | x,1/2-y,1/2+z     | 0.93     | 2.59     | 3.438(5)  | 151      |
| C20-H20...O2AA                                                                                                  | 1-x,-y,1-z        | 0.93     | 2.50     | 3.318(11) | 148      |
| <b>[Co<sub>3</sub>(tiron-bpy)<sub>2</sub>(bpy)(H<sub>2</sub>O)<sub>8</sub>].(H<sub>2</sub>O)<sub>2</sub>, 2</b> |                   |          |          |           |          |
| O1W-H1WA...O7                                                                                                   | -x,1-y,1-z        | 0.86(13) | 1.93     | 2.710(6)  | 150      |
| O1W-H1WB...O8                                                                                                   | x,-1+y,z          | 0.86(13) | 1.94     | 2.800(6)  | 177      |
| O2W-H2WB...O5W                                                                                                  |                   | 0.79(11) | 2.55(12) | 3.140(14) | 132(12)  |
| O2W-H2WA...N2                                                                                                   | x,y,-1+z          | 0.85     | 1.97     | 2.821(8)  | 176      |
| O3W-H3WA...O6                                                                                                   | 1+x,-1+y,z        | 0.85     | 2.04     | 2.867(7)  | 162      |
| O3W-H3WA...O7                                                                                                   | 1+x,-1+y,z        | 0.85     | 2.60     | 3.197(6)  | 129      |
| O3W-H3WB...O2                                                                                                   | 1-x,-y,1-z        | 0.85     | 1.78     | 2.611(5)  | 165      |
| O4W-H4WA...O8                                                                                                   | 1-x,1-y,1-z       | 0.85     | 1.96     | 2.800(7)  | 169      |
| O4W-H4WB...O5W                                                                                                  | 1+x,y,z           | 0.85     | 2.02     | 2.853(15) | 166      |
| O5W-H5WA...O4                                                                                                   |                   | 0.85     | 2.04     | 2.850(13) | 159      |
| O5W-H5WB...O1W                                                                                                  |                   | 0.85     | 2.26     | 2.972(11) | 142      |
| C5-H5...O5                                                                                                      |                   | 0.93     | 2.44     | 2.859(7)  | 107      |
| C5-H5...O7                                                                                                      |                   | 0.93     | 2.49     | 2.886(6)  | 106      |
| C8-H8...O5                                                                                                      | 1-x,1-y,1-z       | 0.93     | 2.59     | 3.442(9)  | 153      |
| C10-H10...O4                                                                                                    | -x,1-y,1-z        | 0.93     | 2.54     | 3.385(8)  | 151      |
| C11-H11...O6                                                                                                    |                   | 0.93     | 2.53     | 2.890(8)  | 104      |
| C18-H18...O5                                                                                                    | 1-x,1-y,-z        | 0.93     | 2.56     | 3.413(10) | 153      |
| C20-H20...O5                                                                                                    | 1+x,-1+y,z        | 0.93     | 2.51     | 3.287(10) | 141      |
| C21-H21...O3W                                                                                                   |                   | 0.93     | 2.32     | 2.912(10) | 121      |
| <b>[Ba<sub>2</sub>(tiron-bpy)<sub>2</sub>(H<sub>2</sub>O)<sub>4</sub>][Solvent], 3</b>                          |                   |          |          |           |          |
| O1W-H1WA...N2                                                                                                   | 1+x,1/2-y,1/2+z   | 0.93     | 2.05     | 2.80(2)   | 136      |
| O2W-H2WB...N2                                                                                                   | 1+x,y,1+z         | 0.84     | 2.46     | 3.27 (2)  | 161      |
| O1W-H1WB...O2W                                                                                                  | x,1/2-y,-1/2+z    | 0.81(5)  | 2.48(6)  | 3.146(18) | 140(5)   |
| C5-H5...O5                                                                                                      |                   | 0.93     | 2.49     | 2.883(6)  | 106      |
| C5-H54...O8                                                                                                     |                   | 0.93     | 2.46     | 2.841(6)  | 105      |
| C12-H12...O2W                                                                                                   | 1-x, 1/2+y,-1/2+z | 0.93     | 2.58     | 3.093(11) | 115      |

#Where 'D' is donor and 'A' is acceptor, the bond lengths are in (Å) and angles are in (°).

**Table S2.** Complete list of bond lengths [Å] and bond angles [°] for complex **1-3<sup>#</sup>**

| <b>[Cd(tiron)(bpy)<sub>2</sub>(H<sub>2</sub>O)<sub>2</sub>].0.5(H<sub>2</sub>O), 1</b>                          |            |                      |            |                          |           |             |           |
|-----------------------------------------------------------------------------------------------------------------|------------|----------------------|------------|--------------------------|-----------|-------------|-----------|
| Cd1-O1                                                                                                          | 2.335(3)   | S1A-O3               | 1.432(14)  | N2-C12                   | 1.333(5)  | C9-C14      | 1.487(5)  |
| Cd1-O1W                                                                                                         | 2.290(3)   | S1A-O3A              | 1.90(3)    | N2-C16                   | 1.345(5)  | C10-C11     | 1.378(5)  |
| Cd1-O2W <sup>b</sup>                                                                                            | 2.333(3)   | S1A-C5               | 1.874(15)  | N3-C17                   | 1.329(5)  | C12-C13     | 1.380(5)  |
| Cd1-N1                                                                                                          | 2.333(3)   | S2-O4                | 1.441(3)   | N3-C21                   | 1.326(5)  | C13-C14     | 1.382(5)  |
| Cd1-N2 <sup>a</sup>                                                                                             | 2.316(3)   | S2-O5                | 1.442(3)   | N4-C22                   | 1.315(6)  | C14-C15     | 1.393(5)  |
| Cd1-N3                                                                                                          | 2.358(3)   | S2-O6                | 1.453(3)   | N4-C26                   | 1.315(6)  | C15-C16     | 1.364(5)  |
| S1-S1A                                                                                                          | 0.553(9)   | S2-C3                | 1.783(4)   | C1-C6                    | 1.384(6)  | C17-C18     | 1.377(6)  |
| S1-O1                                                                                                           | 1.445(7)   | O2-O2A               | 0.951(8)   | C1-C2                    | 1.388(6)  | C18-C19     | 1.379(5)  |
| S1-O2                                                                                                           | 1.460(18)  | O2-O3A               | 1.501(12)  | C2-C3                    | 1.394(5)  | C19-C20     | 1.378(6)  |
| S1-O2A                                                                                                          | 1.99(2)    | O3-O3A               | 1.067(10)  | C3-C4                    | 1.394(5)  | C19-C24     | 1.482(5)  |
| S1-O3                                                                                                           | 1.45(2)    | O3W-O3W <sup>c</sup> | 1.598(12)  | C4-C5                    | 1.373(6)  | C20-C21     | 1.379(6)  |
| S1-O3A                                                                                                          | 1.269(11)  | O7-C2                | 1.340(5)   | C5-C6                    | 1.390(6)  | C22-C23     | 1.383(6)  |
| S1-C5                                                                                                           | 1.728(6)   | O8-C1                | 1.354(5)   | C7-C8                    | 1.374(5)  | C23-C24     | 1.368(6)  |
| S1A-O1                                                                                                          | 1.498(13)  | N1-C7                | 1.334(5)   | C8-C9                    | 1.379(5)  | C24-C25     | 1.381(6)  |
| S1A-O2                                                                                                          | 1.02(2)    | N1-C11               | 1.332(5)   | C9-C10                   | 1.384(5)  | C25-C26     | 1.388(6)  |
| S1A-O2A                                                                                                         | 1.44(3)    |                      |            |                          |           |             |           |
| O1-Cd1-O1W                                                                                                      | 86.45(14)  | O3A-S1-C5            | 121.0(7)   | S1A-O2-O3A               | 66.0(11)  | S1-C5-C4    | 125.0(8)  |
| O1-Cd1-O2W <sup>b</sup>                                                                                         | 174.79(10) | S1-S1A-O1            | 73.8(19)   | O2A-O2-O3A               | 158.4(10) | S1-C5-C6    | 113.1(8)  |
| O1-Cd1-N1                                                                                                       | 97.14(11)  | S1-S1A-O2            | 133.8(15)  | S1-O2A-S1A               | 1.8(4)    | S1A-C5-C4   | 110.0(7)  |
| O1-Cd1-N2 <sup>a</sup>                                                                                          | 87.21(10)  | S1-S1A-O2A           | 173.5(15)  | S1-O2A-O2                | 43.5(6)   | S1A-C5-C6   | 128.7(8)  |
| O1-Cd1-N3                                                                                                       | 93.36(11)  | S1-S1A-O3            | 29.2(10)   | S1A-O2A-O2               | 44.9(7)   | C4-C5-C6    | 121.3(4)  |
| O1W-Cd1-O2W <sup>b</sup>                                                                                        | 89.16(14)  | S1-S1A-O3A           | 61.9(12)   | S1-O3-S1A                | 10.8(3)   | C1-C6-C5    | 119.2(4)  |
| O1W-Cd1-N1                                                                                                      | 90.51(14)  | S1-S1A-C5            | 66.3(15)   | S1-O3-O3A                | 58.4(8)   | N1-C7-C8    | 123.4(4)  |
| O1W-Cd1-N2 <sup>a</sup>                                                                                         | 173.59(14) | O1-S1A-O2            | 140.3(16)  | S1A-O3-O3A               | 48.1(8)   | C7-C8-C9    | 120.0(4)  |
| O1W-Cd1-N3                                                                                                      | 89.93(14)  | O1-S1A-O2A           | 112.7(11)  | S1-O3A-S1A               | 22.6(3)   | C8-C9-C10   | 117.0(3)  |
| O2W <sup>b</sup> -Cd1-N1                                                                                        | 85.72(11)  | O1-S1A-O3            | 88.9(12)   | S1-O3A-O2                | 62.9(10)  | C8-C9-C14   | 122.1(3)  |
| O2W <sup>b</sup> -Cd1-N2 <sup>a</sup>                                                                           | 97.12(11)  | O1-S1A-O3A           | 114.8(14)  | S1-O3A-O3                | 75.9(13)  | C10-C9-C14  | 120.9(3)  |
| O2W <sup>b</sup> -Cd1-N3                                                                                        | 83.80(11)  | O2-S1A-O2A           | 41.1(11)   | S1A-O3A-O2               | 40.7(11)  | C9-C10-C11  | 119.3(4)  |
| N1-Cd1-N2 <sup>a</sup>                                                                                          | 91.21(11)  | O2-S1A-O3            | 107.0(8)   | S1A-O3A-O3               | 98.2(14)  | N1-C11-C10  | 123.8(4)  |
| N1-Cd1-N3                                                                                                       | 169.50(11) | O2-S1A-O3A           | 73.3(7)    | O2-O3A-O3                | 138.8(9)  | N2-C12-C13  | 123.8(4)  |
| N2 <sup>a</sup> -Cd1-N3                                                                                         | 89.50(11)  | O2A-S1A-O3A          | 113.9(14)  | Cd1-N1-C7                | 122.9(3)  | C12-C13-C14 | 119.4(3)  |
| S1A-S1-O1                                                                                                       | 84.6(17)   | O3-S1A-O2A           | 147.4(8)   | Cd1-N1-C11               | 120.3(2)  | C9-C14-C13  | 121.7(3)  |
| S1A-S1-O2                                                                                                       | 30.3(11)   | O3-S1A-O3A           | 33.7(7)    | C7-N1-C11                | 116.5(3)  | C9-C14-C15  | 121.5(3)  |
| S1A-S1-O2A                                                                                                      | 4.7(11)    | O1-S1A-C5            | 98.6(10)   | Cd1 <sup>d</sup> -N2-C12 | 123.3(3)  | C13-C14-C15 | 116.8(3)  |
| S1A-S1-O3                                                                                                       | 140.0(13)  | O2-S1A-C5            | 117.7(7)   | Cd1 <sup>d</sup> -N2-C16 | 120.1(2)  | C14-C15-C16 | 120.2(4)  |
| S1A-S1-O3A                                                                                                      | 95.5(13)   | O2A-S1A-C5           | 111.4(8)   | C12-N2-C16               | 116.7(3)  | N2-C16-C15  | 123.1(4)  |
| S1A-S1-C5                                                                                                       | 96.7(16)   | O3-S1A-C5            | 87.7(11)   | Cd1-N3-C17               | 118.6(3)  | N3-C17-C18  | 123.7(4)  |
| O1-S1-O2                                                                                                        | 109.7(12)  | O3A-S1A-C5           | 103.9(12)  | Cd1-N3-C21               | 122.3(3)  | C17-C18-C19 | 120.3(4)  |
| O1-S1-O2A                                                                                                       | 89.3(10)   | O4-S2-O5             | 113.0(2)   | C17-N3-C21               | 116.2(4)  | C18-C19-C20 | 115.7(4)  |
| O1-S1-O3                                                                                                        | 112.3(10)  | O4-S2-O6             | 113.4(2)   | C22-N4-C26               | 116.0(4)  | C18-C19-C24 | 121.8(4)  |
| O1-S1-O3A                                                                                                       | 130.8(5)   | O5-S2-O6             | 112.4(2)   | O8-C1-C2                 | 120.4(4)  | C20-C19-C24 | 122.5(4)  |
| O2-S1-O2A                                                                                                       | 26.6(5)    | O4-S2-C3             | 106.68(18) | O8-C1-C6                 | 120.3(4)  | C19-C20-C21 | 120.6(4)  |
| O2-S1-O3                                                                                                        | 112.0(5)   | O5-S2-C3             | 105.73(19) | C2-C1-C6                 | 119.3(4)  | N3-C21-C20  | 123.3(4)  |
| O2-S1-O3A                                                                                                       | 66.3(7)    | O6-S2-C3             | 104.68(18) | O7-C2-C1                 | 116.1(4)  | N4-C22-C23  | 123.6(5)  |
| O2A-S1-O3                                                                                                       | 137.8(6)   | Cd1-O1-S1            | 142.1(6)   | O7-C2-C3                 | 124.2(4)  | C22-C23-C24 | 120.7(5)  |
| O2A-S1-O3A                                                                                                      | 92.5(10)   | Cd1-O1-S1A           | 124.2(10)  | C1-C2-C3                 | 119.7(4)  | C19-C24-C23 | 122.4(4)  |
| O3-S1-O3A                                                                                                       | 45.7(7)    | S1-O1-S1A            | 21.6(2)    | S2-C3-C2                 | 119.9(3)  | C19-C24-C25 | 121.7(4)  |
| O1-S1-C5                                                                                                        | 107.8(4)   | S1-O2-S1A            | 15.9(6)    | S2-C3-C4                 | 120.1(3)  | C23-C24-C25 | 115.9(4)  |
| O2-S1-C5                                                                                                        | 104.0(8)   | S1-O2-O2A            | 109.8(10)  | C2-C3-C4                 | 120.0(4)  | C24-C25-C26 | 119.3(4)  |
| O2A-S1-C5                                                                                                       | 95.0(8)    | S1A-O2-O2A           | 94.0(14)   | C3-C4-C5                 | 119.3(4)  | N4-C26-C25  | 124.5(4)  |
| O3-S1-C5                                                                                                        | 110.7(10)  | S1-O2-O3A            | 50.7(7)    | S1-C5-S1A                | 17.05(17) |             |           |
| <b>[Co<sub>3</sub>(tiron-bpy)<sub>2</sub>(bpy)(H<sub>2</sub>O)<sub>3</sub>].(H<sub>2</sub>O)<sub>2</sub>, 2</b> |            |                      |            |                          |           |             |           |
| Co1-O1                                                                                                          | 2.203(3)   | S1-O4                | 1.433(4)   | N2-C12                   | 1.347(14) | C9-C10      | 1.377(9)  |
| Co1-O1 <sup>e</sup>                                                                                             | 2.203(3)   | S1-O5                | 1.443(4)   | N2-C16                   | 1.291(13) | C9-C14      | 1.474(9)  |
| Co1-O2                                                                                                          | 2.000(3)   | S1-C6                | 1.793(5)   | N3-C17                   | 1.295(9)  | C10-C11     | 1.366(8)  |
| Co1-O2 <sup>e</sup>                                                                                             | 2.001(3)   | S2-O6                | 1.432(4)   | N3-C21                   | 1.340(9)  | C12-C13     | 1.362(13) |
| Co1-O1W                                                                                                         | 2.121(4)   | S2-O7                | 1.454(4)   | C1-C2                    | 1.447(7)  | C13-C14     | 1.388(12) |
| Co1-O1W <sup>e</sup>                                                                                            | 2.121(4)   | S2-O8                | 1.449(4)   | C1-C6                    | 1.405(6)  | C14-C15     | 1.350(11) |

|                                                                                        |            |                                       |            |                          |            |                           |           |
|----------------------------------------------------------------------------------------|------------|---------------------------------------|------------|--------------------------|------------|---------------------------|-----------|
| Co2-O1                                                                                 | 2.142(3)   | S2-C4                                 | 1.773(5)   | C2-C3                    | 1.398(7)   | C15-C16                   | 1.366(14) |
| Co2-O3                                                                                 | 2.058(4)   | O1-C1                                 | 1.308(6)   | C3-C4                    | 1.403(7)   | C17-C18                   | 1.378(10) |
| Co2-O2W                                                                                | 2.132(4)   | O2-C2                                 | 1.310(6)   | C4-C5                    | 1.361(7)   | C18-C19                   | 1.372(10) |
| Co2-O3W                                                                                | 2.062(4)   | N1-C3                                 | 1.441(6)   | C5-C6                    | 1.378(7)   | C19-C20                   | 1.356(10) |
| Co2-O4W                                                                                | 2.104(5)   | N1-C7                                 | 1.345(7)   | C7-C8                    | 1.366(9)   | C19-C19 <sup>f</sup>      | 1.491(11) |
| Co2-N3                                                                                 | 2.174(4)   | N1-C11                                | 1.356(7)   | C8-C9                    | 1.396(9)   | C20-C2)                   | 1.362(10) |
| S1-O3                                                                                  | 1.465(4)   |                                       |            |                          |            |                           |           |
| O1-Co1-O1 <sup>e</sup>                                                                 | 180        | O3W-Co2-N3                            | 87.15(16)  | C7-N1-C11                | 120.5(5)   | N1-C7-C8                  | 121.2(6)  |
| O1-Co1-O2                                                                              | 79.05(12)  | O4W-Co2-N3                            | 87.16(19)  | C12-N2-C16               | 116.2(8)   | C7-C8-C9                  | 119.7(6)  |
| O1-Co1-O2 <sup>e</sup>                                                                 | 100.95(12) | O3-S1-O4                              | 112.4(3)   | Co2-N3-C17               | 125.9(4)   | C8-C9-C10                 | 117.4(6)  |
| O1-Co1-O1W                                                                             | 84.51(15)  | O3-S1-O5                              | 111.6(3)   | Co2-N3-C21               | 119.1(4)   | C8-C9-C14                 | 120.1(6)  |
| O1-Co1-O1W <sup>e</sup>                                                                | 95.49(15)  | O4-S1-O5                              | 113.4(3)   | C17-N3-C21               | 114.5(5)   | C10-C9-C14                | 122.5(6)  |
| O2-Co1-O2 <sup>e</sup>                                                                 | 180        | O3-S1-C6                              | 106.9(2)   | O1-C1-C2                 | 116.4(4)   | C9-C10-C11                | 121.8(5)  |
| O2-Co1-O1W                                                                             | 93.68(14)  | O4-S1-C6                              | 105.8(2)   | O1-C1-C6                 | 127.7(4)   | N1-C11-C10                | 119.3(5)  |
| O2-Co1-O1W <sup>e</sup>                                                                | 86.32(14)  | O5-S1-C6                              | 106.0(2)   | C2-C1-C6                 | 115.9(4)   | N2-C12-C13                | 122.5(10) |
| O1W <sup>e</sup> -Co1-O1W                                                              | 180        | O6-S2-O7                              | 112.0(3)   | O2-C2-C1                 | 119.8(4)   | C12-C13-C14               | 119.9(10) |
| O1-Co2-O3                                                                              | 89.90(14)  | O6-S2-O8                              | 113.1(3)   | O2-C2-C3                 | 120.7(4)   | C9-C14-C13                | 119.0(7)  |
| O1-Co2-N3                                                                              | 90.96(16)  | O6-S2-C4                              | 107.0(2)   | C1-C2-C3                 | 119.5(4)   | C9-C14-C15                | 124.3(7)  |
| O1-Co2-O2W                                                                             | 177.18(15) | O7-S2-O8                              | 112.5(3)   | N1-C3-C2                 | 115.0(4)   | C13-C14-C15               | 116.5(7)  |
| O1-Co2-O3W                                                                             | 90.39(14)  | O7-S2-C4                              | 106.0(2)   | N1-C3-C4                 | 123.6(4)   | C14-C15-C16               | 119.9(9)  |
| O1-Co2-O4W                                                                             | 91.56(16)  | O8-S2-C4                              | 105.6(2)   | C2-C3-C4                 | 121.4(4)   | N2-C16-C15                | 124.9(10) |
| O3-Co2-O2W                                                                             | 90.67(17)  | C1-O1-Co1                             | 108.9(3)   | S2-C4-C3                 | 120.5(4)   | N3-C17-C18                | 125.2(6)  |
| O3-Co2-O3W                                                                             | 177.81(17) | Co1-O1-Co2                            | 123.92(15) | S2-C4-C5                 | 120.3(4)   | C19-C18-C17               | 119.5(6)  |
| O3-Co2-O4W                                                                             | 89.8(2)    | Co2-O1-C1                             | 124.6(3)   | C3-C4-C5                 | 119.1(4)   | C18-C19-C19 <sup>f</sup>  | 122.9(7)  |
| O3-Co2-N3                                                                              | 92.61(16)  | Co1-O2-C2                             | 113.8(3)   | C4-C5-C6                 | 120.9(4)   | C18-C19-C20               | 115.5(6)  |
| O2W-Co2-O3W                                                                            | 87.15(17)  | Co2-O3-S1                             | 125.6(2)   | S1-C6-C1                 | 119.3(4)   | C19 <sup>f</sup> -C19-C20 | 121.3(7)  |
| O2W-Co2-O4W                                                                            | 177.44(18) | C3-N1-C7                              | 117.4(4)   | S1-C6-C5                 | 117.7(4)   | C19-C20-C21               | 120.9(7)  |
| O2W-Co2-N3                                                                             | 90.30(19)  | C3-N1-C11                             | 121.9(4)   | C1-C6-C5                 | 123.0(4)   | N3-C21-C20                | 123.8(7)  |
| O3W-Co2-O4W                                                                            | 92.3(2)    |                                       |            |                          |            |                           |           |
| <b>[Ba<sub>2</sub>(tiron-bpy)<sub>2</sub>(H<sub>2</sub>O)<sub>4</sub>][Solvent], 3</b> |            |                                       |            |                          |            |                           |           |
| Ba1-O1                                                                                 | 2.699(3)   | S2-O6                                 | 1.430(4)   | C1-C2                    | 1.428(7)   | C13-C14                   | 1.358(9)  |
| Ba1-O1 <sup>g</sup>                                                                    | 2.724(3)   | S2-O7                                 | 1.451(4)   | C1-C6                    | 1.396(7)   | C14-C15                   | 1.362(10) |
| Ba1-O3                                                                                 | 2.861(4)   | S2-O8                                 | 1.427(4)   | C2-C3                    | 1.366(7)   | C15-C16                   | 1.374(10) |
| Ba1-O4 <sup>g</sup>                                                                    | 2.864(4)   | S1-C6                                 | 1.768(5)   | C3-C4                    | 1.400(7)   |                           |           |
| Ba1-O6 <sup>h</sup>                                                                    | 2.796(4)   | S2-C4                                 | 1.763(5)   | C4-C5                    | 1.392(7)   |                           |           |
| Ba1-O7 <sup>i</sup>                                                                    | 2.877(4)   | O1-C1                                 | 1.309(6)   | C5-C6                    | 1.390(7)   |                           |           |
| Ba1-O1W                                                                                | 2.831(4)   | O2-C2                                 | 1.348(6)   | C7-C8                    | 1.359(9)   |                           |           |
| Ba1-O1W <sup>g</sup>                                                                   | 2.872(4)   | N1-C3                                 | 1.465(6)   | C8-C9                    | 1.389(8)   |                           |           |
| Ba1-O2W                                                                                | 2.878(7)   | N1-C7                                 | 1.327(7)   | C9-C10                   | 1.372(8)   |                           |           |
| S1-O3                                                                                  | 1.454(4)   | N1-C11                                | 1.338(7)   | C9-C14                   | 1.496(8)   |                           |           |
| S1-O4                                                                                  | 1.457(4)   | N2-C12                                | 1.302(10)  | C10-C11                  | 1.363(8)   |                           |           |
| S1-O5                                                                                  | 1.448(4)   | N2-C16                                | 1.328(10)  | C12-C13                  | 1.392(10)  |                           |           |
| O1-Ba1-O1 <sup>g</sup>                                                                 | 127.04(13) | O6 <sup>h</sup> -Ba1-O7 <sup>i</sup>  | 112.61(14) | Ba1 <sup>i</sup> -O4-S1  | 128.7(2)   | C8-C9-C14                 | 123.6(6)  |
| O1-Ba1-O3                                                                              | 66.22(10)  | O6 <sup>h</sup> -Ba1-O1W              | 147.40(12) | Ba1 <sup>h</sup> -O6-S2  | 136.8(2)   | C10-C9-C14                | 120.1(6)  |
| O1 <sup>g</sup> -Ba1-O3                                                                | 134.75(10) | O6 <sup>h</sup> -Ba1-O1W <sup>g</sup> | 64.97(15)  | Ba1 <sup>k</sup> -O7-S2  | 128.0(2)   | C9-C10-C11                | 121.3(6)  |
| O1-Ba1-O4 <sup>g</sup>                                                                 | 146.97(10) | O6 <sup>h</sup> -Ba1-O2W              | 121.87(17) | Ba1-O1W-Ba1 <sup>l</sup> | 103.36(13) | N1-C11-C10                | 120.4(6)  |
| O1 <sup>g</sup> -Ba1-O4 <sup>g</sup>                                                   | 66.27(10)  | O7 <sup>l</sup> -Ba1-O1W              | 64.31(15)  | C11-N1-C3                | 117.3(5)   | N2-C12-C13                | 124.2(8)  |
| O1-Ba1-O6 <sup>h</sup>                                                                 | 75.28(11)  | O7 <sup>l</sup> -Ba1-O1W <sup>g</sup> | 152.83(11) | C7-N1-C11                | 120.3(5)   | C14-C13-C12               | 119.4(8)  |
| O1 <sup>g</sup> -Ba1-O6 <sup>h</sup>                                                   | 71.42(10)  | O7 <sup>l</sup> -Ba1-O2W              | 125.32(17) | C12-N2-C16               | 115.7(7)   | C9-C14-C13                | 120.4(7)  |
| O1-Ba1-O7 <sup>i</sup>                                                                 | 74.47(11)  | O1W-Ba1-O1W <sup>g</sup>              | 133.3(2)   | O1-C1-C2                 | 118.2(4)   | C9-C14-C15                | 122.8(6)  |
| O1 <sup>g</sup> -Ba1-O7 <sup>i</sup>                                                   | 81.80(10)  | O1W-Ba1-O2W                           | 67.5(2)    | O1-C1-C6                 | 125.2(5)   | C13-C14-C15               | 116.8(7)  |
| O1-Ba1-O1W                                                                             | 72.74(11)  | O1W <sup>g</sup> -Ba1-O2W             | 65.78(19)  | C2-C1-C6                 | 116.6(4)   | C14-C15-C16               | 120.0(8)  |
| O1-Ba1-O1W <sup>g</sup>                                                                | 126.84(13) | O3-S1-O4                              | 111.6(2)   | O2-C2-C1                 | 119.8(4)   | N2-C16-C15                | 123.7(8)  |
| O1 <sup>g</sup> -Ba1-O1W                                                               | 135.16(13) | O3-S1-O5                              | 112.3(2)   | O2-C2-C3                 | 119.7(5)   |                           |           |
| O1 <sup>g</sup> -Ba1-O1W <sup>g</sup>                                                  | 71.73(10)  | O4-S1-O5                              | 112.7(2)   | C1-C2-C3                 | 120.3(5)   |                           |           |
| O1-Ba1-O2W                                                                             | 113.89(19) | O3-S1-C6                              | 107.3(2)   | C2-C3-C4                 | 123.0(5)   |                           |           |
| O3-Ba1-O4 <sup>g</sup>                                                                 | 129.77(11) | O4-S1-C6                              | 106.3(2)   | N1-C3-C2                 | 114.2(5)   |                           |           |
| O3-Ba1-O6 <sup>h</sup>                                                                 | 72.27(12)  | O5-S1-C6                              | 106.1(2)   | N1-C3-C4                 | 122.8(5)   |                           |           |
| O3-Ba1-O7 <sup>i</sup>                                                                 | 137.74(11) | O6-S2-O7                              | 110.9(3)   | C3-C4-C5                 | 116.8(5)   |                           |           |
| O3-Ba1-O1W                                                                             | 89.05(14)  | O6-S2-O8                              | 114.9(3)   | S2-C4-C5                 | 120.2(4)   |                           |           |

|                                       |            |                         |            |           |          |
|---------------------------------------|------------|-------------------------|------------|-----------|----------|
| O3-Ba1-O1W <sup>g</sup>               | 68.95(11)  | O7-S2-O8                | 112.3(3)   | C6-C5-C4  | 121.1(5) |
| O3-Ba1-O2W                            | 62.66(16)  | O7-S2-C4                | 106.7(2)   | S1-C6-C1  | 117.3(4) |
| O4 <sup>g</sup> -Ba1-O6 <sup>h</sup>  | 133.99(11) | O8-S2-C4                | 104.8(2)   | C1-C6-C5  | 120.6(4) |
| O4 <sup>g</sup> -Ba1-O7 <sup>i</sup>  | 78.74(13)  | Ba1-O1-Ba1 <sup>j</sup> | 111.21(11) | C1-C6-C5  | 122.0(5) |
| O4 <sup>g</sup> -Ba1-O1W              | 78.46(12)  | Ba1-O1-C1               | 123.3(3)   | N1-C7-C8  | 120.7(6) |
| O4 <sup>g</sup> -Ba1-O1W <sup>g</sup> | 84.96(13)  | Ba1 <sup>j</sup> -O1-C1 | 114.6(3)   | C7-C8-C9  | 121.0(6) |
| O4 <sup>g</sup> -Ba1-O2W              | 67.64(17)  | Ba1-O3-S1               | 128.6(2)   | C8-C9-C10 | 116.2(6) |

#Symmetry transformations used to generate equivalent atoms:

(a)  $x-1, -y+3/2, z-1/2$ ; (b)  $-x+1, -y+1, -z+1$ ; (c)  $-x, -y+1, -z+1$ ; (d)  $x+1, -y+3/2, z+1/2$ ; (e)  $-x+1, -y+2, -z+1$ ; (f)  $-x, -y+2, -z+2$ ; (g)  $x, -y+3/2, z-1/2$ ; (h)  $-x+1, -y+1, -z$ ; (i)  $-x+1, y+1/2, -z+1/2$ ; (j)  $x, -y+3/2, z+1/2$ ; (k)  $-x+1, y-1/2, -z+1/2$ ;

**Table S3.** Filtering fingerprint by element type. Surface area included (as percentage of the total surface area) for close contacts between atoms inside and outside the surface for complex **1-3**.

| Inside Atom                                                                                                     | Outside Atom |     |      |     |      |      |      |
|-----------------------------------------------------------------------------------------------------------------|--------------|-----|------|-----|------|------|------|
| <b>[Cd(tiron)(bpy)<sub>2</sub>(H<sub>2</sub>O)<sub>2</sub>].0.5(H<sub>2</sub>O), 1</b>                          |              |     |      |     |      |      |      |
| Atom                                                                                                            | Cd           | S   | O    | N   | H    | C    | All  |
| C                                                                                                               | .            | 0.0 | 2.7  | 0.7 | 8.6  | 7.2  | 19.2 |
| Cd                                                                                                              | .            | .   | .    | 0.8 | 0.1  | .    | 0.9  |
| H                                                                                                               | 0.1          | 0.0 | 17.0 | 3.3 | 26.4 | 7.3  | 54.1 |
| N                                                                                                               | 0.8          | .   | 0.2  | 0.3 | 4.1  | 0.7  | 6.1  |
| O                                                                                                               | .            | .   | 1.6  | 0.2 | 15.6 | 2.2  | 19.6 |
| S                                                                                                               | .            | .   | .    | .   | 0.0  | 0.0  | 0.0  |
| All                                                                                                             | 0.9          | 0.0 | 21.4 | 5.3 | 54.9 | 17.4 |      |
| <b>[Co<sub>3</sub>(tiron-bpy)<sub>2</sub>(bpy)(H<sub>2</sub>O)<sub>8</sub>].(H<sub>2</sub>O)<sub>2</sub>, 2</b> |              |     |      |     |      |      |      |
| Atom                                                                                                            | Co           | S   | O    | N   | H    | C    | All  |
| C                                                                                                               | .            | 0.0 | 2.6  | 0.1 | 11.8 | 2.1  | 16.5 |
| Co                                                                                                              | .            | .   | 2.2  | .   | 0.2  | .    | 2.4  |
| H                                                                                                               | .            | 0.0 | 18.2 | 1.9 | 25.9 | 9.3  | 55.3 |
| N                                                                                                               | .            | .   | 0.4  | .   | 2.5  | 0.1  | 3.0  |
| O                                                                                                               | .            | .   | 1.7  | 0.4 | 19.0 | 1.8  | 22.9 |
| S                                                                                                               | .            | .   | .    | .   | 0.0  | 0.0  | 0.0  |
| All                                                                                                             | 0.0          | 0.0 | 25.0 | 2.4 | 59.3 | 13.3 |      |
| <b>[Ba<sub>2</sub>(tiron-bpy)<sub>2</sub>(H<sub>2</sub>O)<sub>4</sub>][Solvent], 3</b>                          |              |     |      |     |      |      |      |
| Atom                                                                                                            | Ba           | S   | O    | N   | H    | C    | All  |
| Ba                                                                                                              | .            | .   | 5.5  | .   | 0.9  | 0.1  | 6.5  |
| C                                                                                                               | 0.0          | .   | 3.0  | 0.8 | 6.8  | 4.0  | 14.7 |
| H                                                                                                               | 0.5          | 0.0 | 12.1 | 2.2 | 24.1 | 5.3  | 44.1 |
| N                                                                                                               | .            | .   | .    | .   | 2.6  | 0.3  | 2.9  |
| O                                                                                                               | 4.2          | 0.0 | 8.1  | .   | 16.6 | 2.8  | 31.7 |
| S                                                                                                               | .            | .   | 0.1  | .   | 0.0  | .    | 0.1  |
| All                                                                                                             | 4.7          | 0.1 | 28.7 | 3.0 | 51.0 | 12.5 |      |

---

**Table S4.** Atomic coordinates ( $\times 10^4$ ) and equivalent isotropic displacement parameters ( $\text{\AA}^2 \times 10^3$ ) for **1-3** U(eq) is defined as one third of the trace of the orthogonalized  $U_{ij}$  tensor.

---



|                                                                                                                 | x          | y          | z         | U(eq)    | x   | y        | z          | U(eq)    |
|-----------------------------------------------------------------------------------------------------------------|------------|------------|-----------|----------|-----|----------|------------|----------|
| <b>[Cd(tiron)(bpy)<sub>2</sub>(H<sub>2</sub>O)<sub>2</sub>].0.5(H<sub>2</sub>O), 1</b>                          |            |            |           |          |     |          |            |          |
| Cd1                                                                                                             | 5408.0(4)  | 6256.1(2)  | 4232.4(2) | 26.41(9) | C4  | 4029(6)  | 6384.6(12) | 8171(3)  |
| S1                                                                                                              | 2860(30)   | 5891.2(14) | 6258(7)   | 32.3(19) | C5  | 2653(6)  | 6152.8(12) | 7485(3)  |
| S1A                                                                                                             | 3620(40)   | 5863(3)    | 6404(9)   | 33(3)    | C6  | 843(6)   | 6152.4(12) | 7640(4)  |
| S2                                                                                                              | 5378.5(15) | 6919.5(3)  | 9962.2(9) | 36.7(2)  | C7  | 6959(6)  | 6940.5(12) | 6198(4)  |
| O1                                                                                                              | 3379(4)    | 6173.0(9)  | 5460(2)   | 42.9(7)  | C8  | 8100(6)  | 7232.3(12) | 6813(4)  |
| O2                                                                                                              | 4408(17)   | 5615(3)    | 6699(6)   | 49(3)    | C9  | 9874(5)  | 7286.7(11) | 6650(3)  |
| O2A                                                                                                             | 5558(18)   | 5758(3)    | 6881(7)   | 41(3)    | C10 | 10428(6) | 7032.6(13) | 5869(4)  |
| O3                                                                                                              | 1146(14)   | 5682(3)    | 5735(7)   | 55(3)    | C11 | 9194(6)  | 6748.6(13) | 5284(4)  |
| O3A                                                                                                             | 2400(20)   | 5525(3)    | 6125(9)   | 64(4)    | C12 | 14165(6) | 7863.9(11) | 8157(3)  |
| O4                                                                                                              | 6668(4)    | 7033.1(10) | 9275(3)   | 50.1(8)  | C13 | 13051(5) | 7554.3(11) | 7609(3)  |
| O5                                                                                                              | 6209(5)    | 6663.6(11) | 10935(3)  | 67.1(11) | C14 | 11138(5) | 7607.2(11) | 7264(3)  |
| O6                                                                                                              | 4392(4)    | 7256.9(10) | 10310(3)  | 56.1(9)  | C15 | 10447(5) | 7977.7(12) | 7505(4)  |
| O7                                                                                                              | 1221(4)    | 6872.1(11) | 9954(3)   | 59.1(10) | C16 | 11644(5) | 8271.0(12) | 8033(4)  |
| O8                                                                                                              | -1349(4)   | 6397.1(11) | 8639(4)   | 59.8(10) | C17 | 3386(6)  | 5925.0(12) | 1677(4)  |
| O1W                                                                                                             | 7037(5)    | 5722.9(11) | 5197(4)   | 70.7(11) | C18 | 2942(6)  | 5658.2(12) | 760(4)   |
| O2W                                                                                                             | 7474(4)    | 6276.2(9)  | 3013(2)   | 36.6(7)  | C19 | 2799(5)  | 5255.0(11) | 973(3)   |
| O3W                                                                                                             | 9124(10)   | 5126(2)    | 5088(8)   | 198(3)   | C20 | 3045(8)  | 5148.7(13) | 2131(4)  |
| N1                                                                                                              | 7469(4)    | 6699.8(9)  | 5425(3)   | 30.3(7)  | C21 | 3497(8)  | 5432.8(13) | 3003(4)  |
| N2                                                                                                              | 13507(4)   | 8220.6(9)  | 8369(3)   | 27.5(7)  | C22 | 2012(8)  | 4772.4(15) | -1996(4) |
| N3                                                                                                              | 3696(5)    | 5818.5(10) | 2796(3)   | 34.5(8)  | C23 | 2274(8)  | 5061.1(14) | -1130(4) |
| N4                                                                                                              | 1909(5)    | 4386.9(12) | -1793(3)  | 46.2(9)  | C24 | 2447(6)  | 4956.4(12) | 14(3)    |
| C1                                                                                                              | 415(5)     | 6396.4(13) | 8489(4)   | 37.4(10) | C25 | 2329(7)  | 4552.2(13) | 230(4)   |
| C2                                                                                                              | 1778(5)    | 6637.8(12) | 9178(3)   | 31.5(9)  | C26 | 2063(8)  | 4284.3(14) | -696(4)  |
| C3                                                                                                              | 3598(5)    | 6627.4(11) | 9032(3)   | 28.3(8)  |     |          |            |          |
| <b>[Co<sub>3</sub>(tiron-bpy)<sub>2</sub>(bpy)(H<sub>2</sub>O)<sub>8</sub>].(H<sub>2</sub>O)<sub>2</sub>, 2</b> |            |            |           |          |     |          |            |          |
| Co1                                                                                                             | 5000       | 10000      | 5000      | 30(1)    | C2  | 6378(5)  | 6949(5)    | 5187(3)  |
| Co2                                                                                                             | 3938(1)    | 8611(1)    | 7275(1)   | 35(1)    | C3  | 7165(5)  | 5595(5)    | 4994(3)  |
| S1                                                                                                              | 6956(2)    | 5536(1)    | 7829(1)   | 38(1)    | C4  | 7832(5)  | 4257(5)    | 5650(3)  |
| S2                                                                                                              | 8766(1)    | 2549(1)    | 5388(1)   | 37(1)    | C5  | 7724(6)  | 4284(5)    | 6492(3)  |
| O1                                                                                                              | 5350(4)    | 8264(4)    | 6211(2)   | 36(1)    | C6  | 6939(6)  | 5599(5)    | 6703(3)  |
| O2                                                                                                              | 5800(4)    | 8194(3)    | 4570(2)   | 32(1)    | C7  | 5752(7)  | 6091(8)    | 3627(4)  |
| O3                                                                                                              | 5298(5)    | 6452(4)    | 7966(2)   | 44(1)    | C8  | 5626(8)  | 6353(9)    | 2748(4)  |
| O4                                                                                                              | 8090(5)    | 6119(5)    | 7988(3)   | 57(1)    | C9  | 6993(8)  | 6228(7)    | 2309(4)  |
| O5                                                                                                              | 7444(6)    | 4002(4)    | 8296(3)   | 58(1)    | C10 | 8447(7)  | 5747(7)    | 2801(4)  |
| O6                                                                                                              | 9303(6)    | 1406(4)    | 6188(3)   | 55(1)    | C11 | 8542(7)  | 5503(6)    | 3680(4)  |
| O7                                                                                                              | 10114(5)   | 2624(5)    | 4909(3)   | 61(1)    | C12 | 5312(15) | 8344(16)   | 30(6)    |
| O8                                                                                                              | 7523(5)    | 2473(4)    | 4863(3)   | 51(1)    | C13 | 5439(13) | 7858(14)   | 909(6)   |
| O1W                                                                                                             | 7370(4)    | 9717(4)    | 5388(3)   | 46(1)    | C14 | 6834(9)  | 6669(8)    | 1355(4)  |
| O2W                                                                                                             | 5555(6)    | 9311(5)    | 7803(3)   | 53(1)    | C15 | 8022(13) | 6078(13)   | 874(6)   |
| O3W                                                                                                             | 2631(5)    | 10799(4)   | 6608(2)   | 45(1)    | C16 | 7808(13) | 6647(15)   | -5(7)    |
| O4W                                                                                                             | 2271(6)    | 7955(6)    | 6795(3)   | 61(1)    | C17 | 2321(13) | 8059(8)    | 8972(6)  |
| O5W                                                                                                             | 9042(13)   | 8422(12)   | 7184(6)   | 124(3)   | C18 | 1464(12) | 8355(8)    | 9664(6)  |
| N1                                                                                                              | 7179(5)    | 5689(4)    | 4084(3)   | 37(1)    | C19 | 501(8)   | 9794(7)    | 9645(4)  |
| N2                                                                                                              | 6505(10)   | 7720(10)   | -438(4)   | 85(2)    | C20 | 637(12)  | 10838(8)   | 8976(5)  |
| N3                                                                                                              | 2406(6)    | 9048(5)    | 8310(3)   | 44(1)    | C21 | 1599(12) | 10448(8)   | 8345(5)  |
| C1                                                                                                              | 6181(5)    | 6970(5)    | 6079(3)   | 29(1)    |     |          |            |          |
| <b>[Ba<sub>2</sub>(tiron-bpy)<sub>2</sub>(H<sub>2</sub>O)<sub>4</sub>][Solvent], 3</b>                          |            |            |           |          |     |          |            |          |
| Ba1                                                                                                             | 3116(1)    | 7555(1)    | -869(1)   | 31(1)    | C3  | 5425(3)  | 5404(3)    | 2656(5)  |
| S1                                                                                                              | 2561(1)    | 5685(1)    | 1300(2)   | 31(1)    | C4  | 4923(3)  | 4730(3)    | 2461(5)  |
| S2                                                                                                              | 5358(1)    | 3790(1)    | 2796(2)   | 31(1)    | C5  | 4044(3)  | 4829(3)    | 1991(6)  |
| O1                                                                                                              | 3888(2)    | 6951(2)    | 1816(4)   | 28(1)    | C6  | 3685(3)  | 5567(3)    | 1782(5)  |
| O2                                                                                                              | 5611(2)    | 6757(2)    | 2605(5)   | 48(1)    | C7  | 6909(4)  | 5270(4)    | 2303(7)  |
| O3                                                                                                              | 2386(2)    | 6117(2)    | -121(4)   | 45(1)    | C8  | 7764(4)  | 5358(5)    | 2817(8)  |
| O4                                                                                                              | 2306(2)    | 6121(2)    | 2543(4)   | 45(1)    | C9  | 8075(4)  | 5589(4)    | 4303(7)  |
| O5                                                                                                              | 2204(2)    | 4909(2)    | 1150(4)   | 42(1)    | C10 | 7477(4)  | 5678(5)    | 5224(7)  |
| O6                                                                                                              | 5861(3)    | 3649(2)    | 1648(5)   | 56(1)    | C11 | 6624(4)  | 5584(5)    | 4675(7)  |
| O7                                                                                                              | 5892(3)    | 3804(2)    | 4295(4)   | 60(1)    | C12 | 10404(5) | 6063(5)    | 4512(11) |
| O8                                                                                                              | 4632(3)    | 3293(2)    | 2734(7)   | 75(2)    | C13 | 9553(4)  | 5879(5)    | 3931(9)  |
| O1W                                                                                                             | 2394(3)    | 8292(3)    | 1434(5)   | 58(1)    | C14 | 8999(4)  | 5759(4)    | 4902(8)  |
| O2W                                                                                                             | 1275(5)    | 7445(4)    | -1399(10) | 135(3)   | C15 | 9329(5)  | 5802(6)    | 6415(9)  |

|    |          |         |         |       |     |          |         |          |       |
|----|----------|---------|---------|-------|-----|----------|---------|----------|-------|
| N1 | 6351(3)  | 5391(2) | 3219(5) | 31(1) | C16 | 10177(5) | 5986(6) | 6893(11) | 95(3) |
| N2 | 10717(4) | 6135(5) | 5954(9) | 87(2) |     |          |         |          |       |
| C1 | 4185(3)  | 6240(3) | 1967(5) | 26(1) |     |          |         |          |       |
| C2 | 5089(3)  | 6133(3) | 2383(6) | 29(1) |     |          |         |          |       |

---

**Table S5.** Anisotropic displacement parameters ( $\text{\AA}^2 \times 10^3$ ) for complex **1-3**. The anisotropic displacement factor exponent takes the form:  $-2\pi^2 [h^2 a^{*2} U_{11} + \dots + 2 h k a^* b^* U_{12}]$

---

|                                                                                                                 | U11    | U22    | U33    | U23    | U13    | U12    | U11 | U22    | U33     | U23    | U13    | U12    |        |
|-----------------------------------------------------------------------------------------------------------------|--------|--------|--------|--------|--------|--------|-----|--------|---------|--------|--------|--------|--------|
| <b>[Cd(tiron)(bpy)<sub>2</sub>(H<sub>2</sub>O)<sub>2</sub>].0.5(H<sub>2</sub>O), 1</b>                          |        |        |        |        |        |        |     |        |         |        |        |        |        |
| Cd1                                                                                                             | 28(1)  | 25(1)  | 26(1)  | -2(1)  | 4(1)   | 0(1)   | C4  | 34(2)  | 34(2)   | 31(2)  | -2(2)  | 14(2)  | -1(2)  |
| S1                                                                                                              | 37(5)  | 29(1)  | 34(2)  | -3(1)  | 15(2)  | 6(2)   | C5  | 53(3)  | 33(2)   | 28(2)  | 2(2)   | 15(2)  | -3(2)  |
| S1A                                                                                                             | 37(7)  | 36(2)  | 30(2)  | -3(2)  | 15(3)  | -3(3)  | C6  | 40(2)  | 38(2)   | 34(2)  | 6(2)   | -5(2)  | -15(2) |
| S2                                                                                                              | 35(1)  | 40(1)  | 32(1)  | 0(1)   | 2(1)   | -8(1)  | C7  | 28(2)  | 37(2)   | 42(2)  | -10(2) | 9(2)   | -7(2)  |
| O1                                                                                                              | 45(2)  | 53(2)  | 35(2)  | 11(1)  | 18(1)  | 11(1)  | C8  | 35(2)  | 37(2)   | 39(2)  | -11(2) | 14(2)  | -3(2)  |
| O2                                                                                                              | 65(8)  | 35(4)  | 51(4)  | 14(3)  | 23(4)  | 31(5)  | C9  | 30(2)  | 25(2)   | 24(2)  | 0(2)   | 4(2)   | -1(2)  |
| O2A                                                                                                             | 45(6)  | 42(5)  | 40(4)  | -4(3)  | 16(4)  | 12(4)  | C10 | 28(2)  | 47(3)   | 40(2)  | -14(2) | 12(2)  | -6(2)  |
| O3                                                                                                              | 53(6)  | 56(5)  | 61(5)  | -31(4) | 21(4)  | -15(4) | C11 | 35(2)  | 45(3)   | 34(2)  | -16(2) | 7(2)   | -3(2)  |
| O3A                                                                                                             | 72(10) | 47(6)  | 80(7)  | -25(5) | 35(7)  | -26(6) | C12 | 30(2)  | 31(2)   | 34(2)  | 0(2)   | 5(2)   | 1(2)   |
| O4                                                                                                              | 33(2)  | 59(2)  | 61(2)  | 3(2)   | 15(2)  | -12(2) | C13 | 31(2)  | 25(2)   | 37(2)  | -2(2)  | 11(2)  | 4(2)   |
| O5                                                                                                              | 67(2)  | 65(2)  | 52(2)  | 20(2)  | -19(2) | -20(2) | C14 | 27(2)  | 28(2)   | 20(2)  | 1(2)   | 6(2)   | -1(2)  |
| O6                                                                                                              | 63(2)  | 53(2)  | 55(2)  | -24(2) | 20(2)  | -12(2) | C15 | 24(2)  | 32(2)   | 41(2)  | -7(2)  | 7(2)   | 1(2)   |
| O7                                                                                                              | 48(2)  | 80(3)  | 58(2)  | -23(2) | 30(2)  | -2(2)  | C16 | 30(2)  | 26(2)   | 44(2)  | -7(2)  | 7(2)   | -1(2)  |
| O8                                                                                                              | 26(2)  | 63(2)  | 91(3)  | 5(2)   | 16(2)  | -5(2)  | C17 | 58(3)  | 26(2)   | 39(2)  | 1(2)   | 6(2)   | -2(2)  |
| O1W                                                                                                             | 55(3)  | 47(2)  | 98(3)  | 20(2)  | -6(2)  | 14(2)  | C18 | 63(3)  | 31(2)   | 28(2)  | -1(2)  | 5(2)   | -5(2)  |
| O2W                                                                                                             | 171(7) | 159(7) | 251(9) | -44(6) | 27(6)  | 50(5)  | C19 | 33(2)  | 27(2)   | 29(2)  | -1(2)  | 3(2)   | -2(2)  |
| O3W                                                                                                             | 42(2)  | 39(2)  | 30(2)  | -8(1)  | 11(1)  | -3(2)  | C20 | 103(4) | 26(2)   | 34(2)  | 2(2)   | 1(3)   | -8(3)  |
| N1                                                                                                              | 26(2)  | 33(2)  | 29(2)  | -7(1)  | 2(1)   | -3(1)  | C21 | 97(4)  | 36(3)   | 26(2)  | 2(2)   | 5(2)   | -18(3) |
| N2                                                                                                              | 30(2)  | 23(2)  | 30(2)  | -4(1)  | 7(1)   | -3(1)  | C22 | 105(5) | 49(3)   | 29(3)  | -6(2)  | 4(3)   | 11(3)  |
| N3                                                                                                              | 43(2)  | 29(2)  | 31(2)  | -3(1)  | 7(2)   | -6(2)  | C23 | 101(4) | 33(3)   | 36(3)  | -4(2)  | 4(3)   | 5(3)   |
| N4                                                                                                              | 53(2)  | 45(2)  | 40(2)  | -13(2) | 10(2)  | 2(2)   | C24 | 38(2)  | 31(2)   | 32(2)  | -3(2)  | 5(2)   | 2(2)   |
| C1                                                                                                              | 25(2)  | 43(2)  | 42(3)  | 11(2)  | 5(2)   | -2(2)  | C25 | 85(4)  | 32(2)   | 39(3)  | -3(2)  | 22(3)  | -1(2)  |
| C2                                                                                                              | 29(2)  | 37(2)  | 30(2)  | 2(2)   | 11(2)  | 2(2)   | C26 | 92(4)  | 34(3)   | 53(3)  | -12(2) | 32(3)  | -4(3)  |
| C3                                                                                                              | 27(2)  | 31(2)  | 26(2)  | 0(2)   | 5(2)   | -3(2)  |     |        |         |        |        |        |        |
| <b>[Co<sub>3</sub>(tiron-bpy)<sub>2</sub>(bpy)(H<sub>2</sub>O)<sub>8</sub>].(H<sub>2</sub>O)<sub>2</sub>, 2</b> |        |        |        |        |        |        |     |        |         |        |        |        |        |
| Co1                                                                                                             | 36(1)  | 28(1)  | 21(1)  | -10(1) | 6(1)   | -7(1)  | C2  | 29(2)  | 37(2)   | 23(2)  | -8(2)  | 0(2)   | -10(2) |
| Co2                                                                                                             | 40(1)  | 36(1)  | 20(1)  | -10(1) | 8(1)   | -7(1)  | C3  | 31(2)  | 32(2)   | 28(2)  | -13(2) | 5(2)   | -10(2) |
| S1                                                                                                              | 45(1)  | 37(1)  | 23(1)  | -9(1)  | 5(1)   | -7(1)  | C4  | 27(2)  | 27(2)   | 35(3)  | -8(2)  | 1(2)   | -6(2)  |
| S2                                                                                                              | 39(1)  | 30(1)  | 42(1)  | -17(1) | 5(1)   | -9(1)  | C5  | 40(3)  | 33(2)   | 30(3)  | -9(2)  | 6(2)   | -12(2) |
| O1                                                                                                              | 50(2)  | 33(2)  | 23(2)  | -12(1) | 10(1)  | -11(2) | C6  | 37(2)  | 28(2)   | 27(2)  | -9(2)  | 9(2)   | -8(2)  |
| O2                                                                                                              | 41(2)  | 26(1)  | 23(2)  | -8(1)  | 5(1)   | -7(1)  | C7  | 46(3)  | 78(4)   | 41(3)  | -11(3) | 3(2)   | -30(3) |
| O3                                                                                                              | 50(2)  | 42(2)  | 26(2)  | -8(2)  | 11(2)  | -8(2)  | C8  | 55(4)  | 93(5)   | 37(3)  | -15(3) | 0(3)   | -38(3) |
| O4                                                                                                              | 53(2)  | 79(3)  | 46(2)  | -30(2) | 3(2)   | -28(2) | C9  | 60(4)  | 55(3)   | 40(3)  | -23(3) | 9(3)   | -23(3) |
| O5                                                                                                              | 77(3)  | 38(2)  | 32(2)  | -1(2)  | 4(2)   | -3(2)  | C10 | 45(3)  | 55(3)   | 34(3)  | -19(2) | 8(2)   | -8(2)  |
| O6                                                                                                              | 72(3)  | 36(2)  | 50(3)  | -15(2) | 1(2)   | -13(2) | C11 | 39(3)  | 50(3)   | 39(3)  | -20(2) | 6(2)   | -9(2)  |
| O7                                                                                                              | 48(2)  | 45(2)  | 90(4)  | -32(2) | 32(2)  | -12(2) | C12 | 105(8) | 149(11) | 52(5)  | -6(6)  | -11(5) | -17(7) |
| O8                                                                                                              | 56(2)  | 46(2)  | 54(3)  | -25(2) | 1(2)   | -19(2) | C13 | 84(6)  | 144(9)  | 50(5)  | -24(5) | 6(4)   | -7(6)  |
| O1W                                                                                                             | 39(2)  | 39(2)  | 60(3)  | -22(2) | 6(2)   | -12(2) | C14 | 72(4)  | 67(4)   | 33(3)  | -16(3) | 1(3)   | -32(3) |
| O2W                                                                                                             | 61(3)  | 52(2)  | 46(2)  | -18(2) | 1(2)   | -20(2) | C15 | 86(6)  | 131(8)  | 46(5)  | -30(5) | 9(4)   | 2(6)   |
| O3W                                                                                                             | 46(2)  | 44(2)  | 28(2)  | -3(2)  | 7(2)   | -4(2)  | C16 | 89(7)  | 140(10) | 61(6)  | -34(6) | 11(5)  | -11(6) |
| O4W                                                                                                             | 60(3)  | 88(3)  | 50(3)  | -33(3) | 13(2)  | -36(3) | C17 | 125(7) | 41(3)   | 85(6)  | -24(4) | 70(6)  | -11(4) |
| O5W                                                                                                             | 150(8) | 145(7) | 99(6)  | -25(6) | 36(6)  | -89(6) | C18 | 121(7) | 48(3)   | 70(5)  | -7(3)  | 65(5)  | -13(4) |
| N1                                                                                                              | 38(2)  | 36(2)  | 36(2)  | -15(2) | 8(2)   | -13(2) | C19 | 57(3)  | 53(3)   | 33(3)  | -16(2) | 18(3)  | -11(3) |
| N2                                                                                                              | 104(6) | 113(6) | 39(3)  | -22(4) | 1(3)   | -45(5) | C20 | 123(8) | 53(4)   | 54(5)  | -8(3)  | 50(5)  | 7(4)   |
| N3                                                                                                              | 48(3)  | 52(3)  | 24(2)  | -12(2) | 13(2)  | -10(2) | C21 | 113(7) | 48(3)   | 51(4)  | -8(3)  | 44(4)  | 6(4)   |
| C1                                                                                                              | 31(2)  | 30(2)  | 24(2)  | -13(2) | 7(2)   | -9(2)  |     |        |         |        |        |        |        |
| <b>[Ba<sub>2</sub>(tiron-bpy)<sub>2</sub>(H<sub>2</sub>O)<sub>4</sub>][Solvent], 3</b>                          |        |        |        |        |        |        |     |        |         |        |        |        |        |
| Ba1                                                                                                             | 42(1)  | 28(1)  | 26(1)  | 3(1)   | 10(1)  | 3(1)   | C3  | 23(3)  | 27(3)   | 32(3)  | 1(2)   | 3(2)   | 5(2)   |
| S1                                                                                                              | 27(1)  | 28(1)  | 38(1)  | 1(1)   | 4(1)   | 0(1)   | C4  | 30(3)  | 16(3)   | 36(3)  | 1(2)   | 7(2)   | 3(2)   |
| S2                                                                                                              | 34(1)  | 20(1)  | 41(1)  | 3(1)   | 9(1)   | 5(1)   | C5  | 35(3)  | 20(3)   | 34(3)  | 1(2)   | 10(2)  | 2(2)   |
| O1                                                                                                              | 32(2)  | 15(2)  | 37(2)  | 0(1)   | 8(2)   | 5(2)   | C6  | 22(3)  | 18(3)   | 27(2)  | -1(2)  | 6(2)   | 3(2)   |
| O2                                                                                                              | 34(2)  | 20(2)  | 88(3)  | 2(2)   | 7(2)   | -2(2)  | C7  | 37(4)  | 75(5)   | 47(4)  | -15(3) | 11(3)  | 3(3)   |
| O3                                                                                                              | 38(2)  | 49(3)  | 43(2)  | 15(2)  | -5(2)  | 0(2)   | C8  | 41(4)  | 98(6)   | 61(4)  | -18(4) | 15(3)  | -9(4)  |
| O4                                                                                                              | 38(2)  | 43(2)  | 58(2)  | -9(2)  | 19(2)  | 1(2)   | C9  | 31(3)  | 53(4)   | 52(4)  | 3(3)   | 1(3)   | -1(3)  |
| O5                                                                                                              | 27(2)  | 33(2)  | 61(3)  | 1(2)   | -1(2)  | -8(2)  | C10 | 43(4)  | 115(7)  | 42(4)  | 10(4)  | -4(3)  | -14(4) |
| O6                                                                                                              | 82(3)  | 42(3)  | 53(3)  | 8(2)   | 36(2)  | 30(2)  | C11 | 37(4)  | 115(6)  | 36(3)  | 9(4)   | 9(3)   | -11(4) |
| O7                                                                                                              | 94(3)  | 41(3)  | 38(2)  | 4(2)   | -4(2)  | 28(2)  | C12 | 45(5)  | 115(8)  | 104(7) | 6(6)   | 17(5)  | -27(5) |
| O8                                                                                                              | 40(3)  | 21(2)  | 163(5) | 17(3)  | 16(3)  | 0(2)   | C13 | 48(4)  | 103(7)  | 68(5)  | 4(4)   | 9(4)   | -7(4)  |
| O1W                                                                                                             | 48(3)  | 74(3)  | 51(3)  | 0(2)   | 7(2)   | 29(3)  | C14 | 33(4)  | 74(5)   | 67(5)  | 6(4)   | 9(3)   | -7(4)  |
| O2W                                                                                                             | 76(5)  | 126(7) | 196(9) | -27(5) | 1(5)   | -5(4)  | C15 | 43(4)  | 138(9)  | 71(5)  | -10(5) | -3(4)  | -22(5) |

## Journal Name

## ARTICLE

|    |       |        |       |        |       |        |     |       |        |       |        |       |        |
|----|-------|--------|-------|--------|-------|--------|-----|-------|--------|-------|--------|-------|--------|
| N1 | 30(2) | 24(2)  | 38(2) | 8(2)   | 3(2)  | 3(2)   | C16 | 58(5) | 125(8) | 95(6) | -17(6) | -1(5) | -24(5) |
| N2 | 48(4) | 116(6) | 90(5) | -13(5) | -7(4) | -23(4) |     |       |        |       |        |       |        |
| C1 | 37(3) | 23(3)  | 20(2) | -1(2)  | 5(2)  | 4(2)   |     |       |        |       |        |       |        |
| C2 | 35(3) | 15(3)  | 38(3) | 1(2)   | 8(2)  | -4(2)  |     |       |        |       |        |       |        |
